**TITLE:** INCIDENCE OF ANESTHETIC  
CARDIAC ARREST IN INFANTS:  
EFFECT OF PEDIATRIC  
ANESTHESIOLOGISTS

**AUTHORS:** RL Keenan, M.D., JH Shapiro, M.D.  
K Dawson

**AFFILIATION:** Department of Anesthesiology  
Medical College of Virginia  
Virginia Commonwealth University  
Richmond, Virginia 23298

Because the anesthetic cardiac arrest rate in infants in our institution is higher than in adults, we questioned whether pediatric anesthesiologists have a lower rate compared to those without pediatric training.

**Methods:** Computerized data at a large university hospital were retrospectively reviewed from July 1, 1983 through March 31, 1990. Records of all reviewed patients aged 365 days or less were retrieved, which included Age, ASA physical status, body weight, presence or absence of an intraoperative cardiac arrest due to anesthesia, and identity of the attending anesthesiologist. Pediatric anesthesiologists were identified from departmental records as those with pediatric fellowship training or equivalent.

**Results:** 4343 anesthetics were given to infants. 2310 were attended by pediatric anesthesiologists, and had no anesthetic cardiac arrests. The other 2033 were attended by non-pediatric anesthesiologists, and had 4 anesthetic cardiac arrests. Mean age and weight, and distribution of physical status were not different between the two provider groups.

|           | Ped. Anes | Nonped. Anes | Total |
|-----------|-----------|--------------|-------|
| Arrest    | 0         | 4            | 4     |
| No Arrest | 2310      | 2029         | 4339  |
| Total     | 2310      | 2033         | 4343  |

This difference between provider groups is significant (Fisher's Exact Probability test,  $P = 0.048$ ). The incidence of anesthetic, cardiac arrest for infants in the hands of non-pediatric anesthesiologists was 19/10,000 anesthetics, and zero for pediatric anesthesiologists.

We conclude that the use of pediatric anesthesiologists significantly decreases anesthetic morbidity in infants.

## A1046

**TITLE:** AN *IN VITRO* EVALUATION OF RELATIVE  
PERFORATION POTENTIALS OF SIX  
EPIDURAL CATHETERS

**AUTHORS:** R.H. Blackshear, MD, N. Gravenstein,  
MD, R.N. Wissler, MD, PhD

**AFFILIATION:** Depts. of Anesth. and Neurosurg.,  
Univ. of Florida, Gainesville, FL  
32610-0254

A complication of epidural catheter placement is acute or delayed perforation of the dura mater with migration of the epidural catheter tip into the subarachnoid space. To study the relative potential of epidural catheter tips to perforate a simulated tissue membrane, we designed an *in vitro* test to evaluate the relative perforating potential of six commonly used epidural catheters (Table).

A catheter testing system consisting of two 37° C water chambers (a large rectangular chamber and a smaller cylindrical chamber) were used. The two chambers were separated internally by a 12.7 micron polyethylene (PE) membrane. Externally a latex membrane covered the cylindrical chamber. Each test catheter was held in a 16g blunt tipped needle with 1 cm of the catheter extending from the tip. The catheters were then mounted at a 70° angle of incidence to within 1 mm of the resting PE membrane. Once the system was activated, a piston striking against the external latex membrane produced hydraulic pressure causing the membrane to pulse 3 mm into the catheter tip. Number of pulsations to perforation of the test membrane was re-

corded. Five of each type of catheter were run 5 times. An arbitrary endpoint of 9600 pulsations was used. Results were analyzed by ANOVA and Tukey tests (Table).

Epidural catheters differ significantly in their relative perforating potential. These data provide another characteristic to consider when choosing an epidural catheter, particularly when it is to be used for a prolonged period.

Table. Pulsations to perforation.

| Catheter                                | Tip | Pulsations (n) | Tukey |
|-----------------------------------------|-----|----------------|-------|
| 19-gauge<br>Nylon                       |     |                |       |
| Pharmaseal                              | B   | 5046 ± 4008    | B     |
| Teflon<br>Deseret                       | O   | 2592 ± 3509    | C     |
| Dual durometer<br>polyurethane<br>Arrow | O   | 8783 ± 1728    | A     |
| 20-gauge<br>Nylon                       |     |                |       |
| Kendall                                 | O   | 4364 ± 3412    | BC†   |
| Burrion                                 | B   | >9600*         | A     |
| Kendall                                 | B   | 8597 ± 2774    | A     |

Values are means ± SD. B = Bullet tip; O = Open tip. \*Burrion 20g, never perforated within 9600 pulsations. †Overlapping Tukey groups. Tukey groups with same letters are not different ( $p < 0.05$ ).

### Reference.

1. Anesthesiology 71:A984, 1989
